# Supplementary material for: Manganese–carbon (Mn–C) interaction to host Al3+-ions in a β-MnO2–MWCNT composite cathode in rechargeable aluminium ion batteries
Source: Royal Society of Chemistry journal article supplement (doi:10.1039/d4nj00708e), 2024-01-01
Supplement: d4nj00708e1.pdf [file d4nj00708e1.pdf]

## Supporting Information

# Manganese-Carbon (Mn-C) interaction to host Al<sup>3+</sup>- ion into $\beta$ -MnO<sub>2</sub>-MWCNT Composite Cathode in Rechargeable Aluminium Ion Batteries

*Mohan Gorle,<sup>a,b</sup> Santosh N. Chavan,<sup>a,b</sup> A.Vijay Kumar<sup>c</sup> and Vatsala Rani Jetti<sup>a,b\*</sup>*

<sup>a</sup>Polymers and Functional Materials, CSIR-Indian Institute of Chemical Technology, Hyderabad-500007, India.

<sup>b</sup>Academy of Scientific and Innovative Research (AcSIR), Ghaziabad-201002, India.

<sup>c</sup>Department of Chemistry, Institute of Chemical Technology, Nathalal Parekh Marg, Matunga, Mumbai, Maharashtra, India – 400019.

\*Dr. Vatsala Rani Jetti, E-mail: vatsala@iict.res.in

### XRD Table:

**Table S1.** Peak intensities of MWCNT/ $\beta$ -MnO<sub>2</sub>-20%

| Peak data of MWCNT/ $\beta$ -MnO <sub>2</sub> -20% |        |        |        |
|----------------------------------------------------|--------|--------|--------|
| $2\theta$                                          | 37.2°  | 56.2°  | 72.3°  |
| hkl                                                | 101    | 211    | 112    |
| $d$ -spacing                                       | 2.45 Å | 1.69 Å | 1.38 Å |

## Charge-discharge capacity data MWCNT/ $\beta$ -MnO<sub>2</sub>-20%

**Table S2.** Charge-discharge capacity data MWCNT/ $\beta$ -MnO<sub>2</sub>-20%

| Sr. No. | Current (mA/g) | Cycle intervals        | Discharge capacity |
|---------|----------------|------------------------|--------------------|
| 1       | 100 mA/g       | 1 <sup>st</sup> cycle  | 269 mAh/g          |
|         |                | 20 <sup>th</sup> cycle | 192 mAh/g          |
| 2       | 300 mA/g       | 21 <sup>th</sup> cycle | 190.4 mAh/g        |
|         |                | 40 <sup>th</sup> cycle | 103.5 mAh/g        |
| 3       | 500 mA/g       | 41 <sup>th</sup> cycle | 102.2 mAh/g        |
|         |                | 58 <sup>th</sup> cycle | 55.5 mAh/g         |

## SEM and EDAX analysis

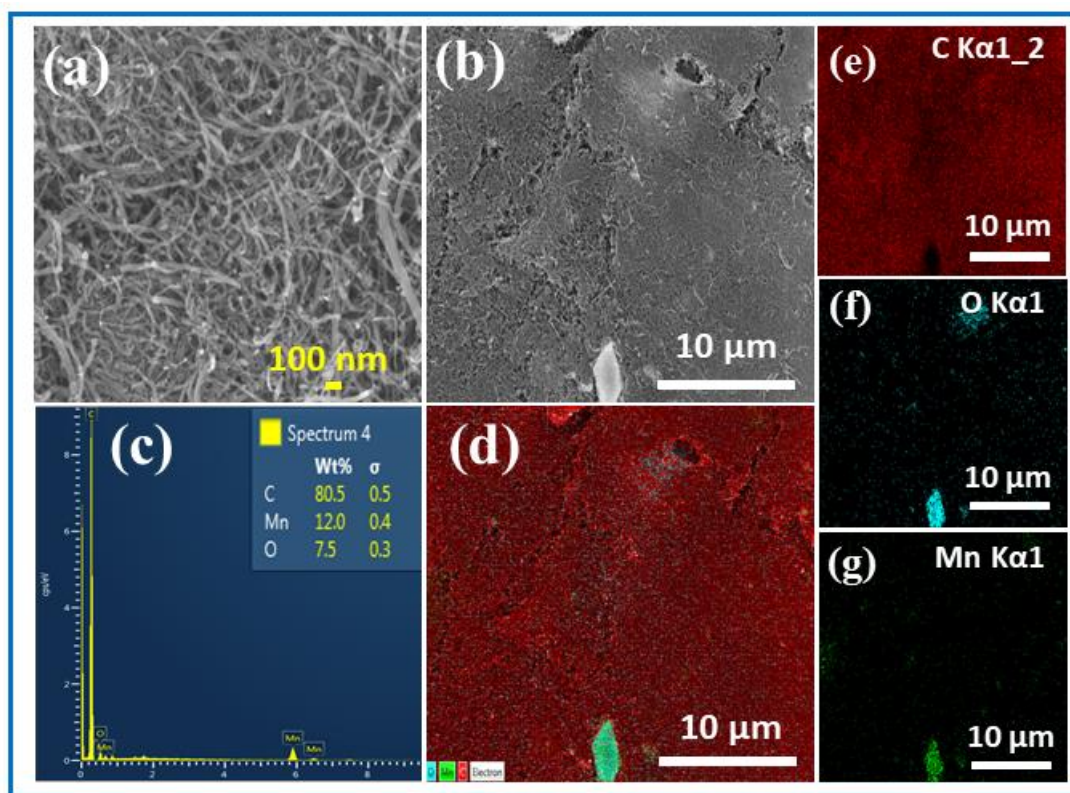

**Fig. S1** (a) FE-SEM and (c) Elemental composition by MWCNT/  $\beta$ -MnO<sub>2</sub>-20% composite (b-d) Elemental color dot mapping by EDAX Overall composite composition and

## TGA analysis

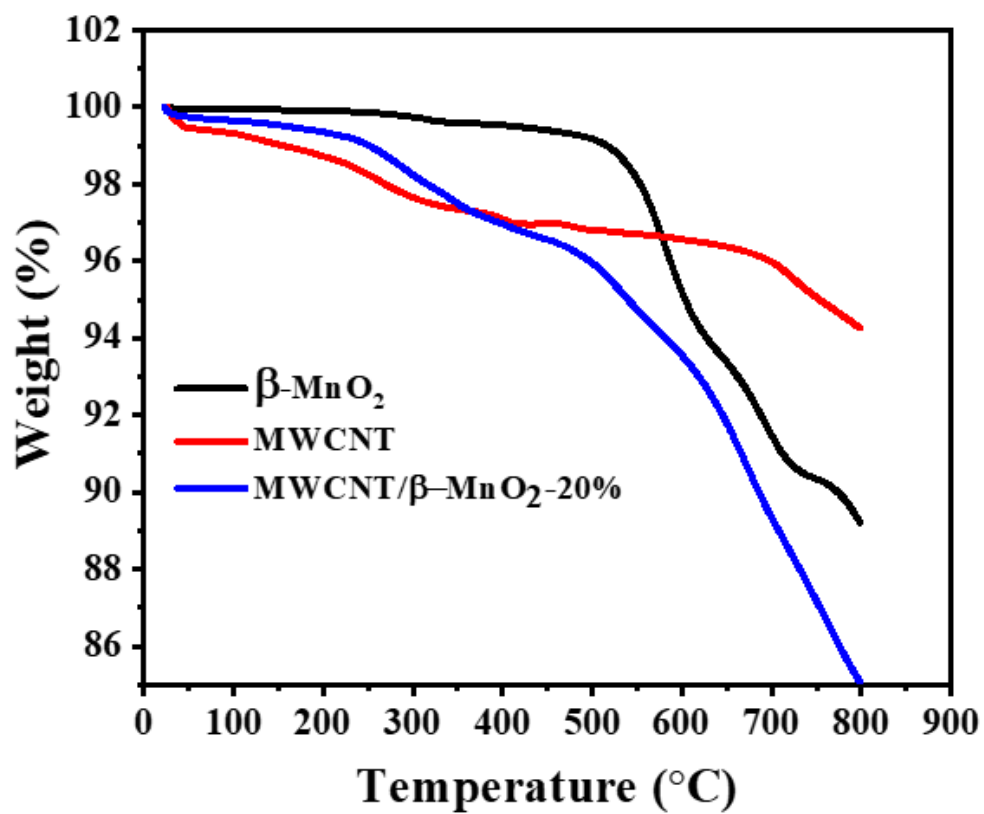

Fig. S2. TGA Analysis of MWCNT/ $\beta$ -MnO<sub>2</sub>-20%, MWCNT,  $\beta$ -MnO<sub>2</sub>

## CV analysis

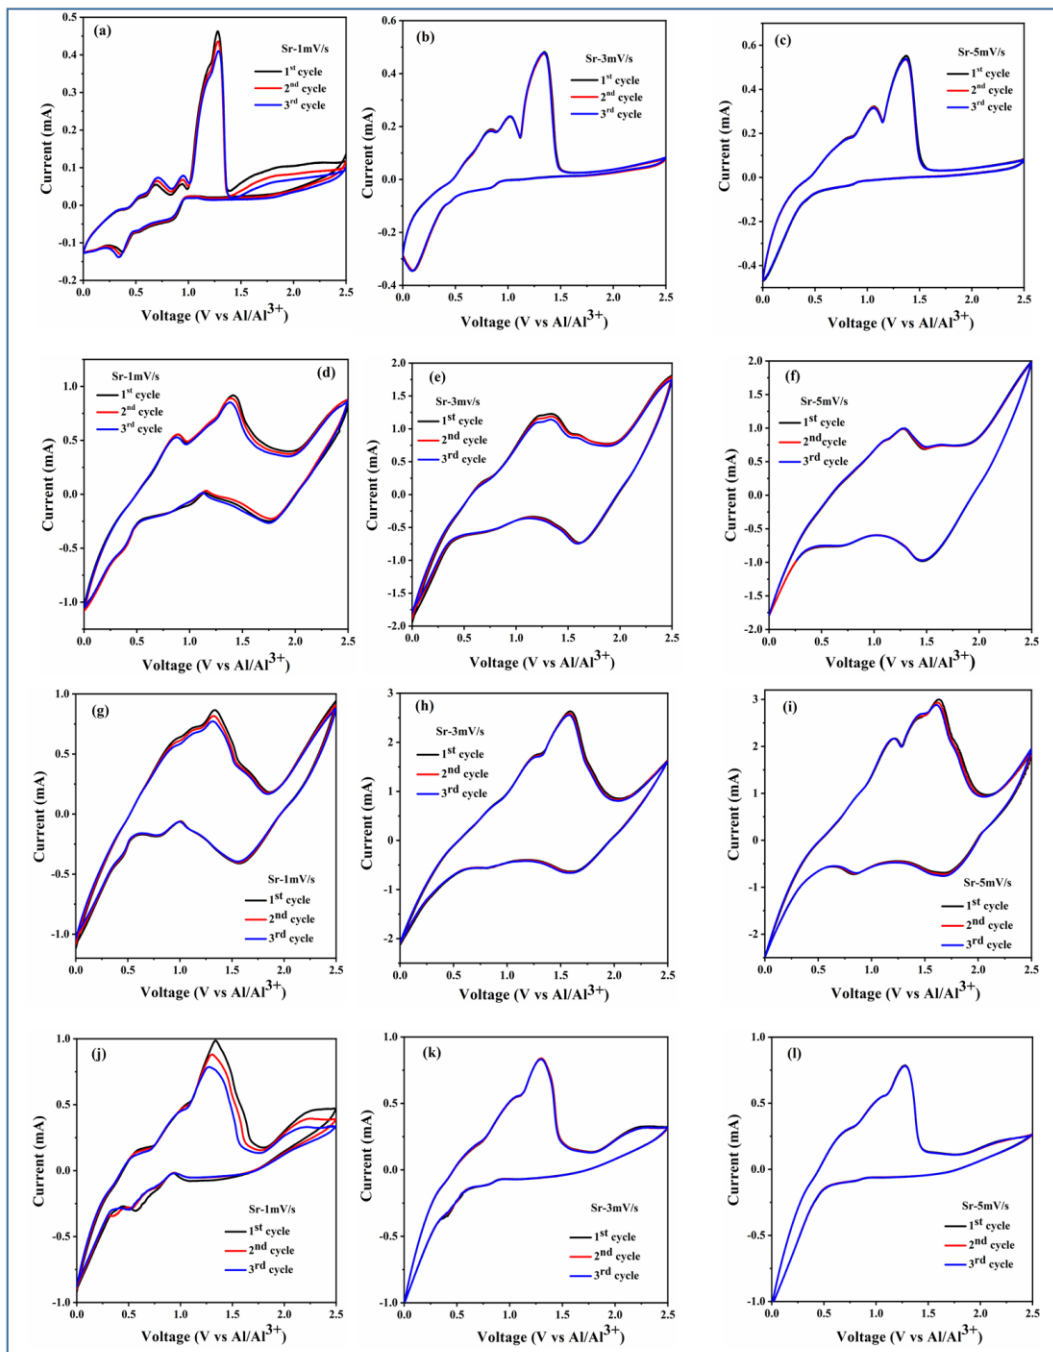

**Fig. S3:** (a-c) CV plot of 1, 3 and 5 mV/s scan rate  $\beta$ -MnO<sub>2</sub> and (d-f) CV plot of 1, 3 and 5 mV/s scan rate MWCNT and (g-i) CV plot of 1, 3 and 5 mV/s scan rate MWCNT/ $\beta$ -MnO<sub>2</sub>-20% and (j-l) CV plot of 1, 3 and 5 mV/s scan rate MWCNT/ $\beta$ -MnO<sub>2</sub>-50%

## EIS analysis

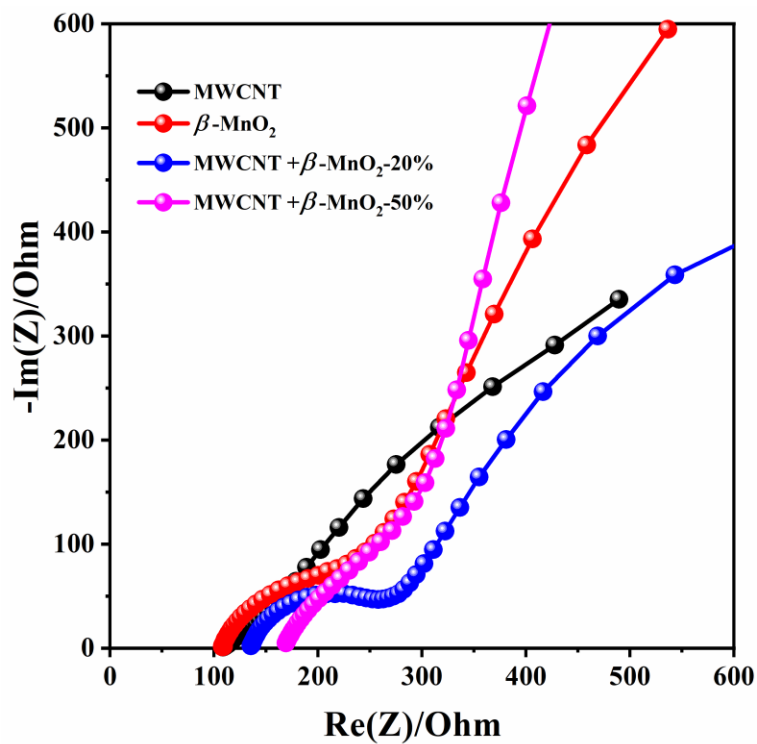

**Fig. S4** Electrochemical Impedance Spectroscopy Study of MWCNT,  $\beta$ -MnO<sub>2</sub>, MWCNT/ $\beta$ -MnO<sub>2</sub>-20%, MWCNT/ $\beta$ -MnO<sub>2</sub>-50%, (at 20 kHz to 100 MHz)

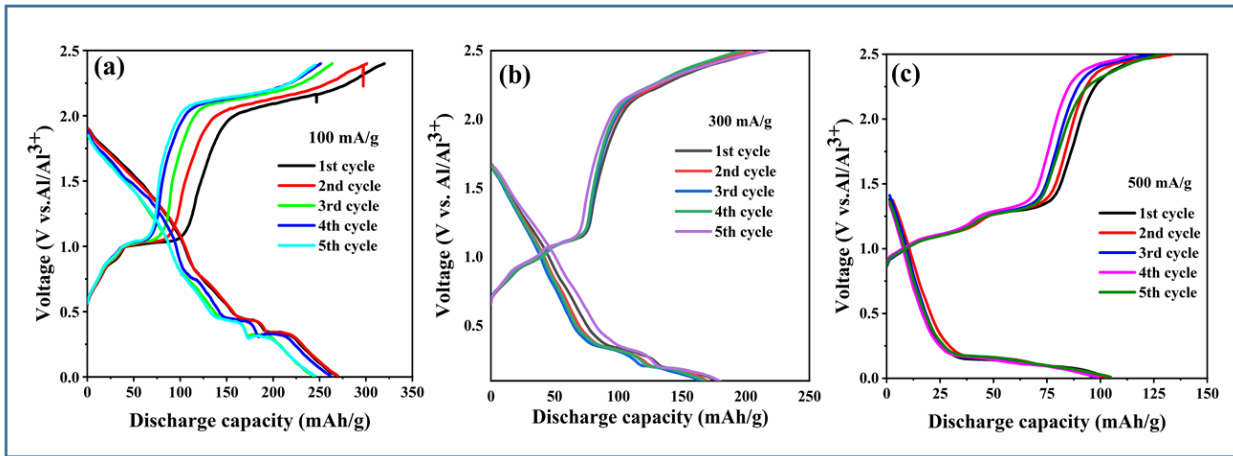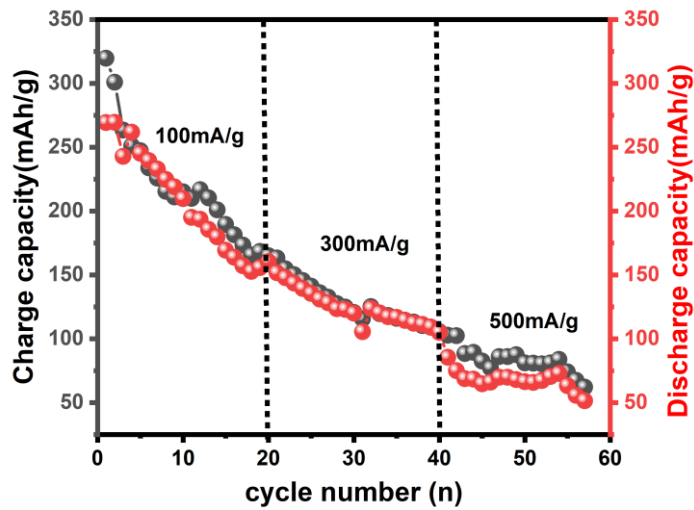

**Fig. S5:** Charge/discharge at different current rate (a) 100 mA/g, (b) 300 mA/g and (c) 500 mA/g

MWCNT/ $\beta$ -MnO<sub>2</sub>-20% (d) overall battery performance at various current.

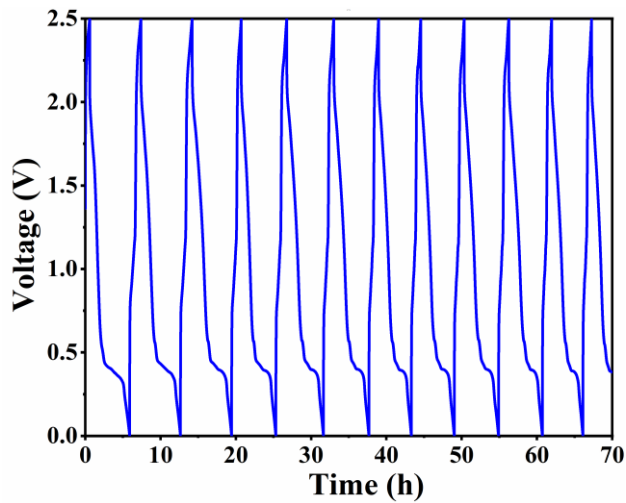

**Fig. S6:** Charge/discharge cycling at current rate 100 mA/g charge –discharge graph Voltage vs. Time

## Cycled FT-IR analysis

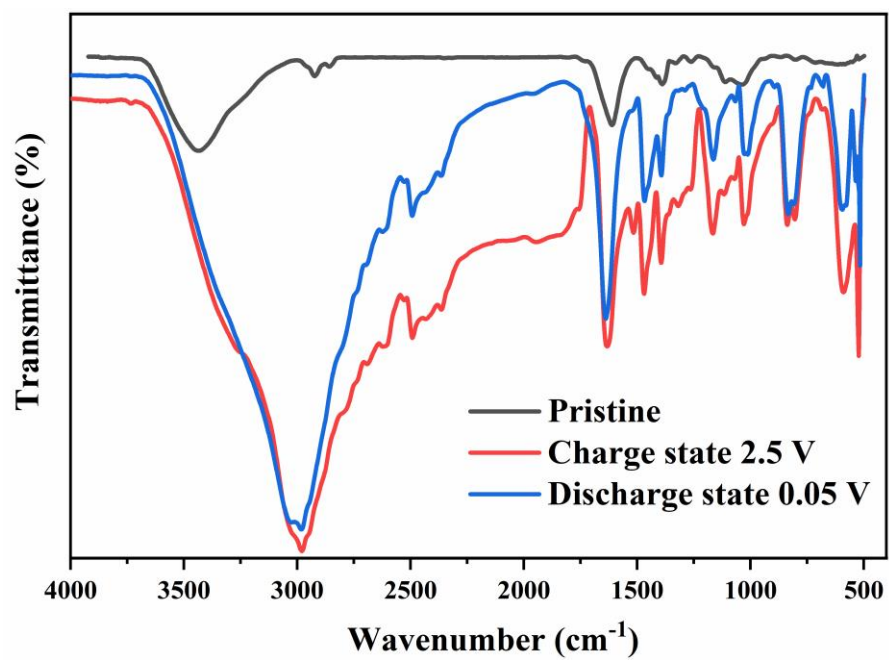

**Fig. S7** FT-IR analysis of Pristine material and Cycled charge state cathode material and discharge state cathode material

## Cycled XRD analysis

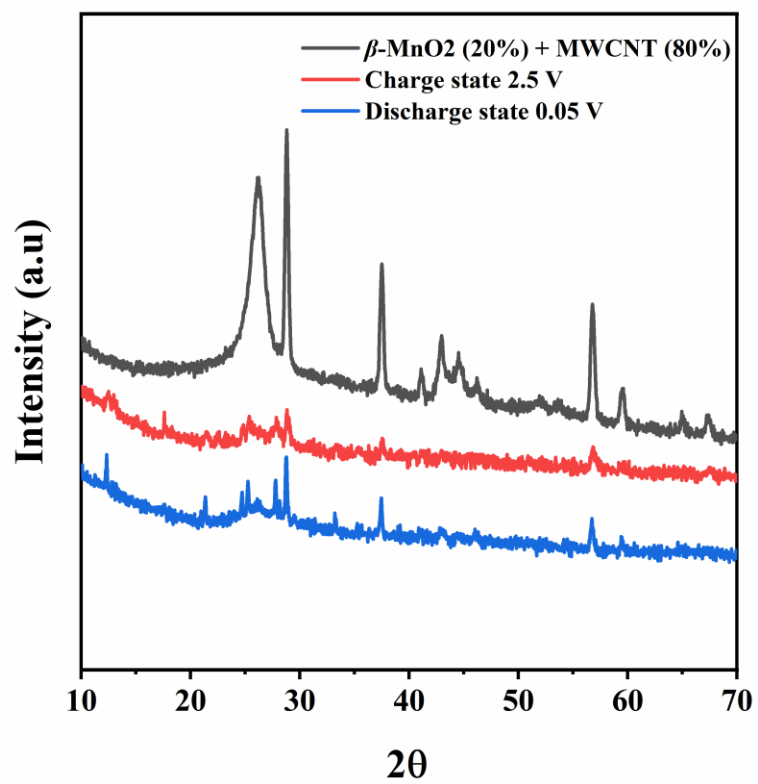

**Fig. S8** XRD analysis of Cycled charge state cathode material and discharge state cathode material



**Table 3. Comparison of the Electrochemical Performance in the Present Work with those of Previously Reported**

| S.No             | Electrode                                           | Electrolyte                                                                                   | Current                | capacity (mAh/g)                                  | Cycle no                                        | Ref. No |
|------------------|-----------------------------------------------------|-----------------------------------------------------------------------------------------------|------------------------|---------------------------------------------------|-------------------------------------------------|---------|
| 1                | $\alpha$ -MnO <sub>2</sub>                          | AlCl <sub>3</sub> /[EMIm]Cl in (1.3:1) AlCl <sub>3</sub> -IL electrolyte                      | 500 mA g <sup>-1</sup> | 100 mAh g <sup>-1</sup>                           | 65                                              | 1       |
| 2                | Birnessite MnO <sub>2</sub>                         | aqueous Al(OTF) <sub>3</sub> and MnSO <sub>4</sub>                                            | 100 mA g <sup>-1</sup> | 320 mAh g <sup>-1</sup>                           | 65                                              | 2       |
| 3                | Al <sub>x</sub> MnO <sub>2</sub> ·nH <sub>2</sub> O | Al(OTF) <sub>3</sub> (5M) solution                                                            | 30 mA g <sup>-1</sup>  | 467 mAh g <sup>-1</sup><br>55 mAh g <sup>-1</sup> | 1 <sup>st</sup> cycle<br>65 cycle               | 3       |
| 4                | Zn-Al electrode                                     | Al(OTF) <sub>3</sub> aqueous electrolyte                                                      | 100 mA g <sup>-1</sup> | 460 mAh g <sup>-1</sup>                           | 80                                              | 4       |
| 5                | $\alpha$ -MnO <sub>2</sub>                          | 4:1:1 of AlCl <sub>3</sub> ·6H <sub>2</sub> O, MnSO <sub>4</sub> ·6H <sub>2</sub> O and water | 500 mA g <sup>-1</sup> | 285 mAh g <sup>-1</sup>                           | 500                                             | 5       |
| 6                | Al <sub>x</sub> MnO <sub>2</sub> cathode            | 2M Al(OTF) <sub>3</sub> aqueous electrolyte                                                   | 500 mA g <sup>-1</sup> | 400 mAh g <sup>-1</sup>                           | 400                                             | 6       |
| 7                | $\delta$ -MnO <sub>2</sub>                          | 1-Ethyl-3-methylimidazolium chloride ([EMIm]) and AlCl <sub>3</sub> (1:1 in weight)           | 100 mA g <sup>-1</sup> | 59 mAh g <sup>-1</sup><br>29 mAh g <sup>-1</sup>  | 1 <sup>st</sup> cycle<br>100 cycle              | 7       |
| <b>This work</b> | $\beta$ -MnO <sub>2</sub> (20%) + MWCNT (80%)       | Triethyl amine hydrochloride (TEA.HCl) and AlCl <sub>3</sub> (1:1.5 in mol)                   | 100 mA g <sup>-1</sup> | 269 mAh g <sup>-1</sup><br>55 mAh g <sup>-1</sup> | 1 <sup>st</sup> cycle<br>65 <sup>th</sup> cycle | -       |

1. Q. Zhao, M. J. Zachman, W. I. Al Sadat, J. Zheng, L. F. Kourkoutis, L. Archer, *Sci. Adv.*, 2018, **4**, 8131.
2. S. He, J. Wang, X. Zhang, J. Chen, Z. Wang, T. Yang, Z. Liu, Y. Liang, B. Wang, S. Liu, L. Zhang, J. Huang, J. Huang, L. A. O'dell, H. Yu, *Adv. Funct. Mater.*, 2019, **29**, 1905228.

3. C. Wu, S. Gu, Q. Zhang, Y. Bai, M. Li, Y. Yuan, H. Wang, X. Liu, Y. Yuan, N. Zhu, F. Wu, H. Li, L. Gu, J. Lu, *Nat. Commun.*, 2019, **10**, 73.
4. C. Yan, C. Lv, L. Wang, W. Cui, L. Zhang, K. N. Dinh, H. Tan, C. Wu, T. Wu, Y. Ren, J. Chen, Z. Liu, M. Srinivasan, X. Rui, Q. Yan, G. Yu, *J. Am. Chem. Soc.*, 2020, **142**, 15295.
5. W. Pan, J. Mao, Y. Wang, X. Zhao, K. W. Leong, S. Luo, Y. Chen, D. Y. C. Leung, *Small Methods*, 2021, **5**, 2100491.
6. Q. Ran, H. Shi, H. Meng, S.-P. Zeng, W.-B. Wan, W. Zhang, Z. Wen, X.-Y. Lang, Q. Jiang, *Nat. Commun.*, 2022, **13**, 576.
7. C. Yan, C. Lv, B.-E. Jia, L. Zhong, X. Cao, X. Guo, H. Liu, W. Xu, D. Liu, L. Yang, J. Liu, H. H. Hng, W. Chen, L. Song, S. Li, Z. Liu, Q. Yan, G. Yu, *J. Am. Chem. Soc.*, 2022, **144**, 11444.
8. P. Almodóvar, D. A. Giraldo, J. Chancón, I. Álvarez-Serrano and M. L. López, *ChemElectroChem*, 2020, **7**, 2102.

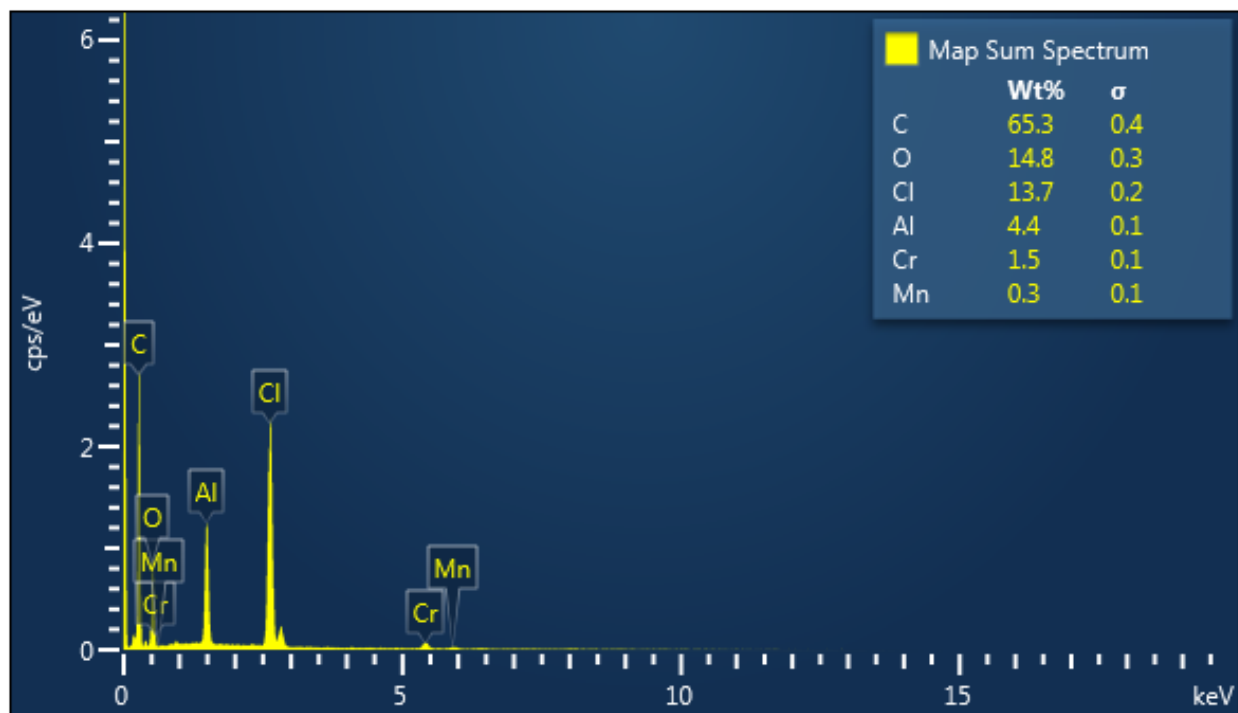

**Fig. S9** Cycled charge state cathode material EDX

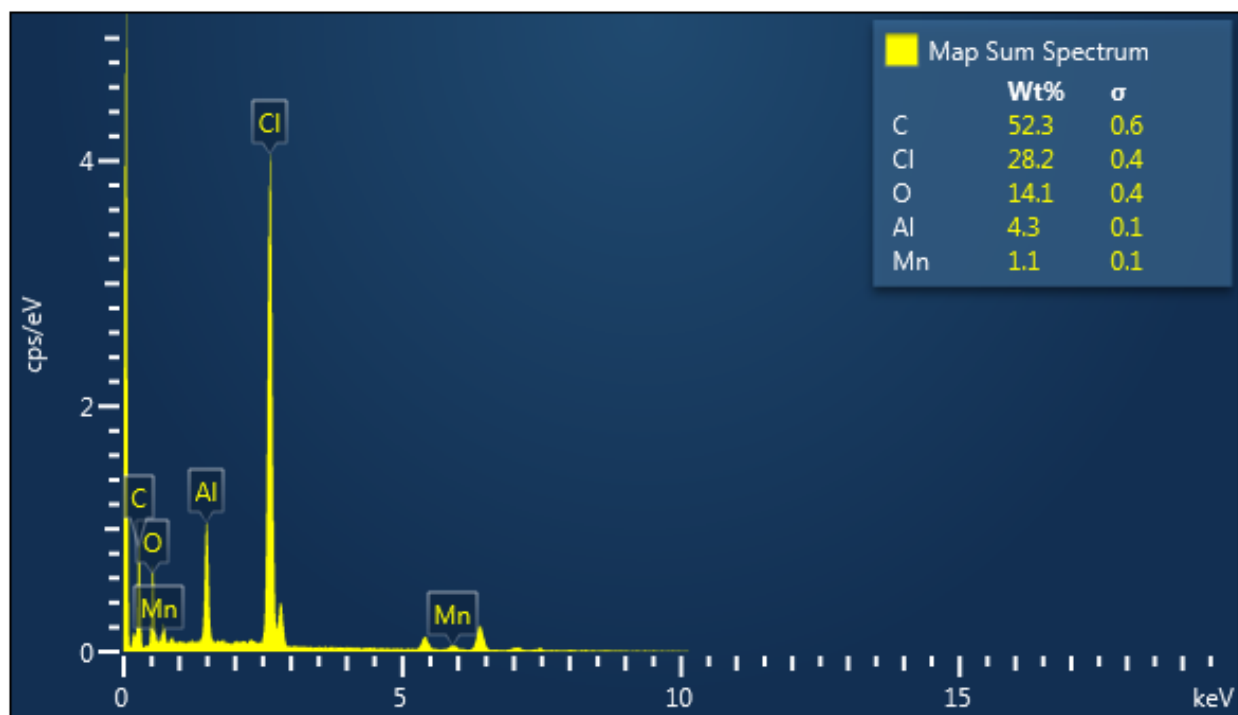

**Fig. S10** Cycled discharge state cathode material EDX
